# Supplementary material for: Extreme Weather Events Enhance DOC Consumption in a Subtropical Freshwater Ecosystem: A Multiple-Typhoon Analysis
Source: MDPI journal article supplement (doi:10.3390/microorganisms9061199), 2021-06-01
Supplement: s1 [file s1]

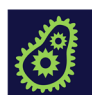

**Table S1.** The name, visiting period, total rainfall, and maximal wind speed of the typhoons that had swept through Taiwan during the period of 2004~2009. The two typhoons (2004 KOMPASU and 2008 NURI) that had almost no precipitation were not included in our analysis.

| Year | Name      | Period      | Total Rainfall@<br>mm | Max wind speed<br>M s <sup>-1</sup> |
|------|-----------|-------------|-----------------------|-------------------------------------|
| 2004 | CONSON    | 06/07~06/09 | 40                    | 33                                  |
|      | MINDULLE  | 06/28~07/03 | 291                   | 45                                  |
|      | KOMPASU   | 07/14~07/15 | 2                     | 20                                  |
|      | RANANIM   | 08/10~08/13 | 205                   | 40                                  |
|      | AERE      | 08/23~08/26 | 541                   | 38                                  |
|      | HAIMA     | 09/11~09/13 | 465                   | 18                                  |
|      | MEARI     | 09/26~09/27 | 213                   | 40                                  |
| 2005 | HAITANG   | 07/16~07/20 | 488                   | 55                                  |
|      | MATSA     | 08/03~08/06 | 410                   | 40                                  |
|      | SANVU     | 08/11~08/13 | 71                    | 25                                  |
|      | TALIM     | 08/30~09/01 | 377                   | 53                                  |
|      | KHANUN    | 09/09~09/11 | 129                   | 43                                  |
|      | DAMREY    | 09/21~09/23 | 394                   | 25                                  |
| 2006 | EWINIAR   | 07/07~07/09 | 28                    | 51                                  |
|      | BILIS     | 07/12~07/15 | 188                   | 25                                  |
|      | KAEMI     | 07/23~07/26 | 57                    | 38                                  |
|      | SAOMAI    | 08/09~08/10 | 146                   | 48                                  |
|      | BOPHA     | 08/07~08/09 | 152                   | 25                                  |
|      | SHANSHAN  | 09/14~09/16 | 161                   | 48                                  |
| 2007 | PABUK     | 08/06~08/08 | 182                   | 28                                  |
|      | WUTIP     | 08/08~08/09 | 94                    | 18                                  |
|      | SEPAT     | 08/16~08/19 | 347                   | 53                                  |
|      | WIPHA     | 09/17~09/19 | 298.2                 | 48                                  |
| 2008 | KALMAEGI  | 07/16~07/18 | 75                    | 33                                  |
|      | FUNG-WONG | 07/26~07/29 | 263                   | 43                                  |
|      | NURI      | 08/19~08/21 | 0                     | 40                                  |
|      | SINLAKU   | 09/11~09/16 | 782                   | 51                                  |
|      | HAGUPIT   | 09/21~09/23 | 19                    | 45                                  |
|      | JANGMI    | 09/26~09/29 | 457.4                 | 53                                  |
| 2009 | LINFA     | 06/19~06/22 | 22                    | 28                                  |
|      | MOLAVE    | 07/16~07/18 | 35                    | 30                                  |
|      | MORAKOT   | 08/05~08/10 | 344                   | 40                                  |

@, accumulated precipitation during the typhoon period.
